# Supplementary material
Source: PubMed Central journal article supplement (PMC2966094)
Supplement: supp_M110.143958_jbc.M110.143958-1.pdf [file supp_M110.143958_jbc.M110.143958-1.pdf]

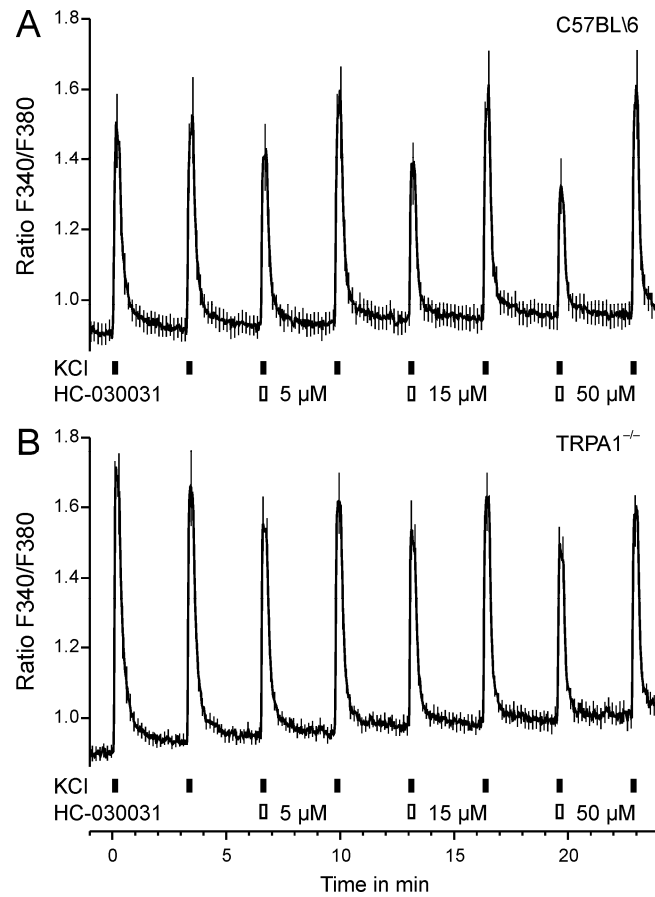

### Supplement 1

HC-030031 blocks calcium influx evoked by 16 mM KCl. In neurons from C57BL/6 (A, 23 neurons, 8 dishes, 2 experiments) and TRPA1 animals (B, 26 neurons, 8 dishes, 1 experiment), HC-030031 15  $\mu$ M and 50  $\mu$ M significantly reduced calcium increases by potassium. Note that BCTC 0.1, 1 and 10  $\mu$ M does not inhibit calcium influx evoked by 16 mM potassium in a similar protocol (data not shown).

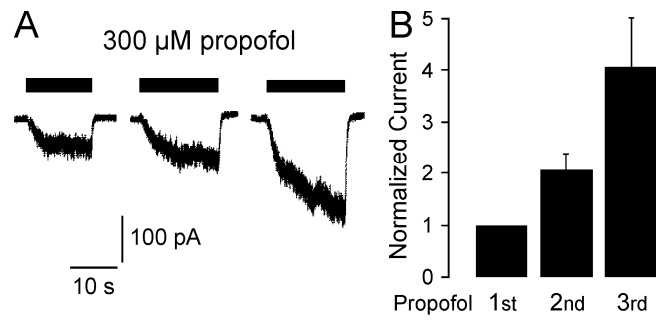

### Supplement 2

Repeated propofol applications on TRPV3-HEK293t cells. (A) Specimen of inward currents upon repeated application of 300  $\mu\text{M}$  propofol. (B) Propofol-evoked currents increase in repetitive applications of propofol. Peak amplitudes of the second and third current responses were normalized to the peak amplitude of the first application ( $n = 9$ ).

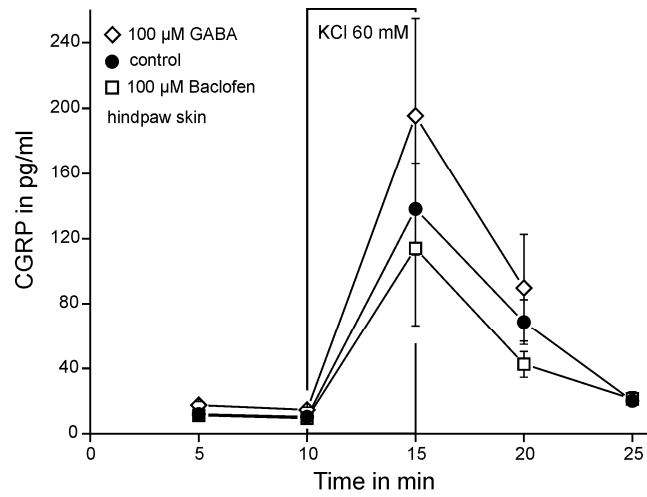

### Supplement 3

CGRP release from C57Bl/6 hindpaw skin induced by high potassium (60 mM, n = 12). Neither 100 μM GABA (n = 4) nor GABA<sub>B</sub> receptor agonist baclofen (100 μM, n = 6) modulate the potassium-induced CGRP release.
